# Supplementary material
Source: MDPI journal article supplement (https://www.mdpi.com/2073-4344/10/11/1295)
Supplement: s1 [file s1]

## Supporting Information

# Impact of Coordination Features of Co(II)-Glycine Complex on the Surface Sites of Co/SiO<sub>2</sub> for Fischer-Tropsch Synthesis

Qing-Qing Hao <sup>1,\*</sup>, Min Hu <sup>1</sup>, Zhi-Xia Xie <sup>1</sup>, Xiaoxun Ma <sup>1</sup>, Wei Wang <sup>2</sup> and Hua-Ping Ren <sup>3,\*</sup>

<sup>1</sup> School of Chemical Engineering, Northwest University, Xi'an, Shaanxi 710069, China;

<sup>2</sup> College of Chemistry and Chemical Engineering, BaoJi University of Arts and Sciences, Baoji 721013, China;

<sup>3</sup> School of Science, Xijing University, Xi'an 710123, China;

\* Correspondence: haoqq@nwu.edu.cn (Q.-Q.H.); renhuaping@xijing.edu.cn (H.-P.R.);

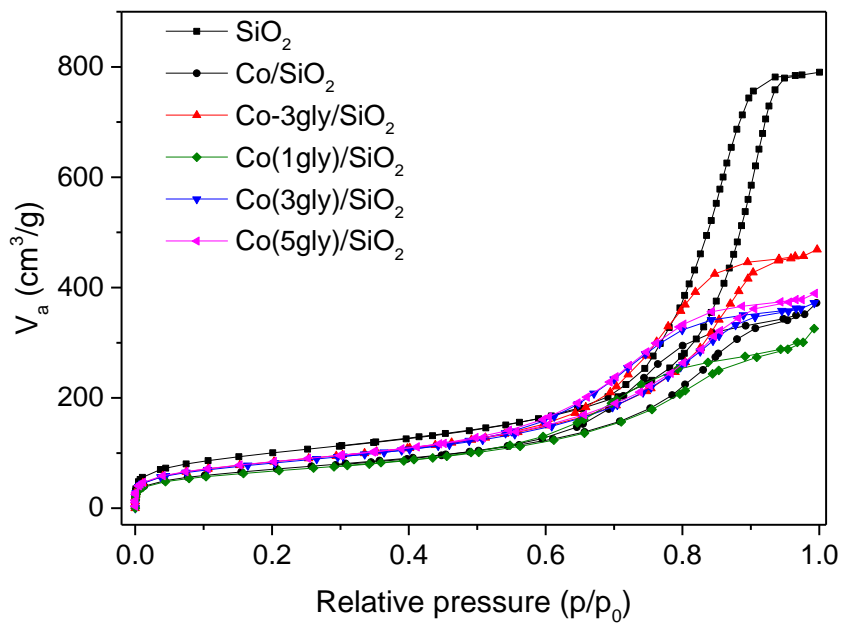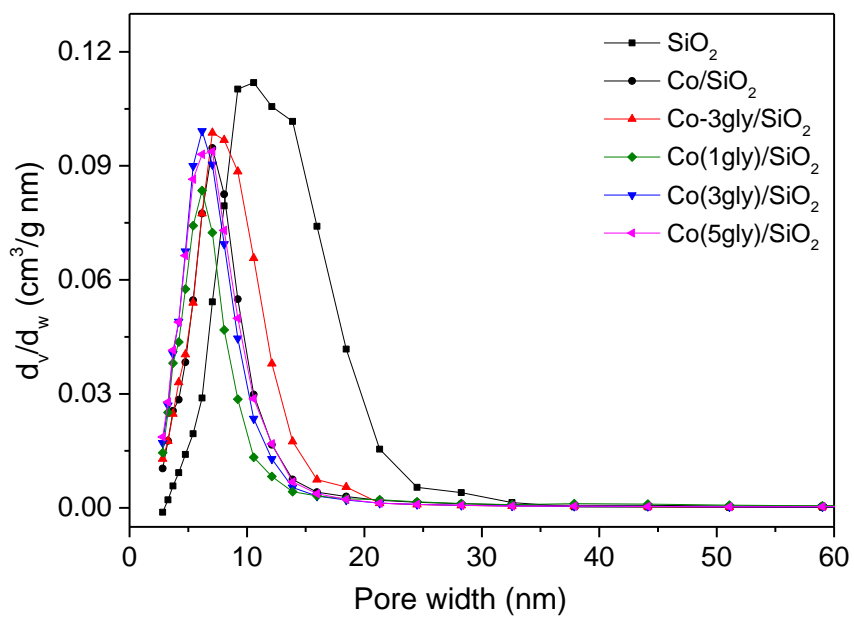

**Figure S1.**  $\text{N}_2$  adsorption-desorption isotherms and BJH pore size distribution of the catalysts.
